# Supplementary material for: Integrated genomic analysis of triple-negative breast cancers reveals novel microRNAs associated with clinical and molecular phenotypes and sheds light on the pathways they control
Source: PubMed Central journal article supplement (PMC4008358; doi:10.1186/1471-2164-14-643), 2013-09-23

*p-val*

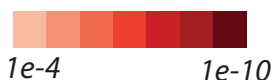

Basal-like Luminal

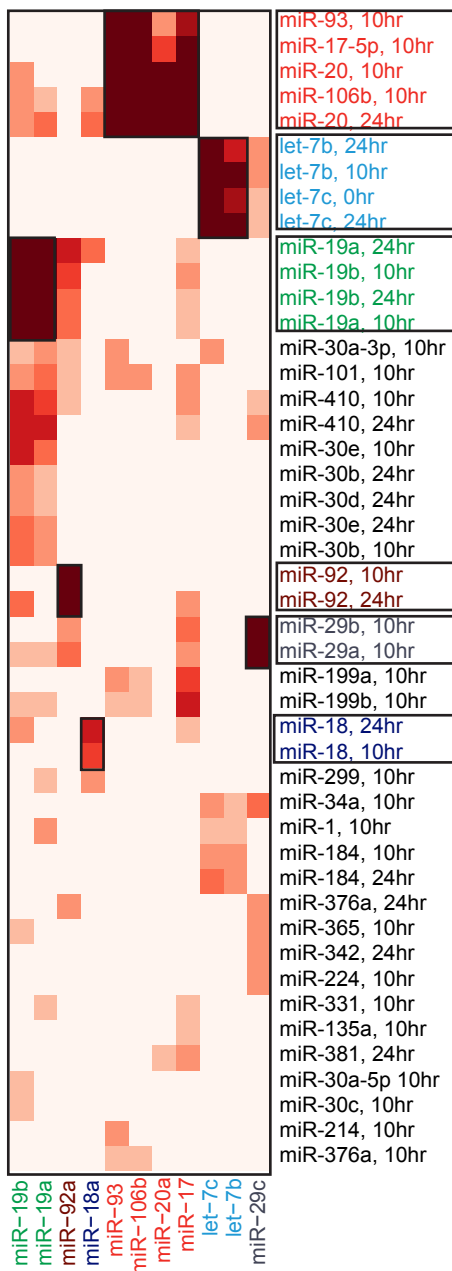

Supplement: 1471-2164-14-643-S10.pdf [file 1471-2164-14-643-S10.pdf]
